1           **PorSignDB: a database of *in vivo* perturbation signatures for**  
2                           **dissecting clinical outcome of PCV2 infection**

3  
4           Nicolaas Van Renne<sup>1¶\*</sup>, Ruifang Wei<sup>1¶</sup>, Nathalie Pochet<sup>2,3</sup>, Hans J. Nauwynck<sup>1</sup>

5  
6  
7  
8  
9  
10  
11   <sup>1</sup>Laboratory of Virology, Faculty of Veterinary Medicine, Ghent University, <sup>2</sup>Ann Romney  
12   Center for Neurologic Diseases, Department of Neurology, Brigham and Women's Hospital,  
13   Harvard Medical School; <sup>3</sup>Broad Institute of Harvard and Massachusetts Institute of  
14   Technology.

15  
16   <sup>¶</sup>These authors contributed equally

17  
18   \*Corresponding author:

19   Nicolaas Van Renne

20   Tel.: +32 489 94 95 39

21   Email: [nicolaas.vanrenne@ugent.be](mailto:nicolaas.vanrenne@ugent.be)

## 22 **Abstract**

23 Porcine Circovirus Type 2 (PCV2) is a pathogen that has the ability to cause often devastating  
24 disease manifestations in pig populations with major economic implications. How PCV2  
25 establishes subclinical persistence and why certain individuals progress to lethal lymphoid  
26 depletion remain to be elucidated. Here we present PorSignDB, a gene signature database  
27 describing *in vivo* porcine tissue physiology that we generated from a large compendium of *in*  
28 *vivo* transcriptional profiles and that we subsequently leveraged for deciphering the distinct  
29 physiological states underlying PCV2-affected lymph nodes. This systems biology approach  
30 indicated that subclinical PCV2 infections shut down the immune system. A robust signature  
31 of PCV2 disease emphasized that immune activation is dysfunctional in subclinical infections,  
32 however, in contrast it is promoted in PCV2 patients with clinical manifestations. Functional  
33 genomics further uncovered IL-2 as a driver of PCV2-mediated disease and we identified  
34 STAT3 as a druggable PCV2 host factor candidate. Our systematic dissection of the  
35 mechanistic basis of PCV2 reveals that subclinical and clinical PCV2 display two diametrically  
36 opposed immunotranscriptomic recalibrations that represent distinct physiological states *in*  
37 *vivo*, which suggests a paradigm shift in this field. Finally, our PorSignDB signature database  
38 is publicly available as a community resource (<http://www.vetvirology.ugent.be/PorSignDB/>,  
39 included in Gene Sets from Community Contributors  
40 [http://software.broadinstitute.org/gsea/msigdb/contributed\\_genesets.jsp](http://software.broadinstitute.org/gsea/msigdb/contributed_genesets.jsp)) and provides  
41 systems biologists with a valuable tool for catalyzing studies of human and veterinary disease.

42

## 43 **Author Summary**

44 Porcine Circovirus Type 2 (PCV2) is a small but economically important pathogen circulating  
45 endemically in pig populations. Although PCV2 causes mostly chronic subclinical infections,  
46 many individuals develop a lethal form of circoviral disease consisting of a collapse of  
47 lymphoid tissue. In order to provide a fresh look at how PCV2 reprograms host tissue, we

48 created PorSignDB, a compendium of hundreds of transcriptomic gene-expression signatures  
49 derived from primary porcine tissue specimens of well over 1500 patients or lab animals. By  
50 leveraging PorSignDB on transcriptomic data of PCV2 patients, we uncover that subclinical  
51 PCV2 reprograms the host into a striking state of non-infection, which explains its failure to  
52 respond to an initial phase of circoviral presence. A PCV2 disease signature further  
53 demonstrates that the silenced immune system associated with subclinical PCV2 becomes  
54 fully activate in PCV2 patients, triggering severe circoviral disease. Further genomic and  
55 functional analysis demonstrate STAT3 as a druggable host factor and IL-2 as a disease  
56 driver. Together, this study demonstrates the mechanistic underpinnings of clinical outcome  
57 of PCV2 infections: subclinical and clinical PCV2 display two entirely opposing transcriptomic  
58 recalibrations of lymphoid tissue.

59

## 60 **Introduction**

61 Porcine circovirus type 2 (PCV2) manifests itself through a range of often devastating  
62 pathologies in swine livestock, causing severe economic losses. The most prominent disease  
63 associated with PCV2 is post-weaning multisystemic wasting syndrome (PMWS). PMWS  
64 patients exhibit progressive weight-loss, respiratory distress, pallor of skin, digestive disorders  
65 and sometimes jaundice, coinciding with pneumonia, nephritis, hepatitis and severe  
66 lymphadenopathy. Pathologic hallmarks in wasting pigs include progressive lymphocytic  
67 depletion and monocyte infiltration in lymph nodes [1], drastically compromising the immune  
68 system with often fatal outcome [2]. Although PCV2 is acknowledged as the causative agent  
69 of PMWS, PCV2 infection alone generally results in a persistent low-level replication without  
70 clinical signs [3]. In fact, PCV2 circulates endemically in pig populations as covert subclinical  
71 infections, seemingly undeterred by vaccination [4]. Pigs with PMWS however, are nearly  
72 always presented with concurrent microbial infections, suggesting a crucial role for  
73 superinfections in triggering PMWS [5]. Indeed, coinfections or other immunostimulations such

74 as adjuvant administration were confirmed to produce PMWS in experimental models [6].  
75 Despite two decades of intensive research, real mechanistic insights into how PCV2 achieves  
76 subclinical persistence and why certain individuals transform from subclinical PCV2 to PMWS  
77 remain unknown.

78 Large data sets measuring the transcriptomic architecture of biological systems combined with  
79 new mathematical and statistical models are currently revolutionizing biomedical research.  
80 Major ongoing efforts focus on identifying and genetically perturbing regulatory networks at  
81 the core of pathological processes, to enable disease outcome prediction [7,8], phenotype  
82 classification [9,10] and drug discovery [11,12]. Specifically for the field of porcine biology,  
83 many individual data sets from live animals were analyzed within the study for which they were  
84 generated, and thus, integrated analysis of the recent wealth of transcriptomic data opens  
85 opportunities for systems biologists. Here we take advantage of large volumes of porcine  
86 transcriptomic studies to create a novel gene signature collection with hundreds of gene sets  
87 characterizing *in vivo* tissue perturbation, which we subsequently interrogated against  
88 circovirus patient studies to gain mechanistic insights into the pathogenesis of host responses  
89 to PCV2 viral infection.

90

## 91 **Results**

### 92 **PorSignDB: a gene set collection characterizing a compendium of *in vivo*** 93 **transcriptomic profiles**

94 We first created PorSignDB, a collection of gene signatures, using a systematic approach  
95 previously developed for inference of the immunologic gene signature collection  
96 ImmuneSigDB [13]. Specifically, we compiled a large gene expression compendium curated  
97 from 88 studies including 1776 unique samples. A total of 412 annotated gene sets were  
98 derived from 206 pairwise comparisons identifying genes induced and repressed in one  
99 phenotype versus another, annotated as 'UP' (PHENOTYPE1\_VS\_PHENOTYPE2\_UP) and

100 'DOWN' (PHENOTYPE1\_VS\_PHENOTYPE2\_DN) gene sets, respectively (Fig 1A). To  
101 illustrate this, an example is given for a study comparing lymph nodes of uninfected pigs  
102 versus those of pigs experimentally infected with *Salmonella enterica Typhimurium* [14].  
103 Upregulated genes (UP gene set) are highly expressed in the uninfected phenotype, while  
104 downregulated genes (DN gene set) are highly expressed in the *Salmonella*-infected  
105 phenotype (Fig 1B). Samples were predominantly derived from real-life patients or laboratory  
106 animals (1519 *in vivo* specimens and 236 *ex vivo* samples), and additionally include some  
107 from cell cultures (21 samples). The samples were derived from a multitude of different tissues  
108 (Fig 1C) and together, they describe host responses in an entire range of biological themes,  
109 with a major part stemming from studies on microbiology, gastroenterology and the  
110 cardiovascular system (Fig 1D).

111 Of note, porcine genes and individual probes were mapped to *Homo sapiens* ortholog genes.  
112 Because many transcriptional programs are evolutionarily conserved, cross-species gene  
113 expression analysis can be applied successfully [15,16]. Moreover, molecular signature  
114 databases are often human-oriented, and the porcine-to-human adaptation of PorSignDB thus  
115 facilitates its application to genomic expression data of any species. The PorSignDB gene  
116 signatures are available as an online resource (<http://www.vetvirology.ugent.be/PorSignDB/>)  
117 and can be used by systems biologists to deconvolute cellular circuitry in health and disease.  
118 As proof of concept, we employed this gene signature collection describing host responses  
119 in a wide variety of tissues to generate new insights in the multisystemic disease associated  
120 with PCV2.

121

## 122 **PorSignDB reveals diametrically opposed physiological states *in vivo* in** 123 **subclinical PCV2 and PMWS**

124 We then leveraged PorSignDB to analyze a field study of pigs naturally affected with PMWS  
125 [17]. To compare transcriptomic profiles of PMWS lymph nodes with PCV2-positive but

126 otherwise healthy lymph nodes, we tested signatures from PorSignDB for their enrichment  
127 (induced or repressed) in both classes using GSEA analysis (Fig 2A). We primarily focused  
128 on gene sets pertaining to microbiology. For robustness, we only retained signatures from  
129 pairwise comparisons in case both upregulated (PHENOTYPE1\_VS\_PHENOTYPE2\_UP)  
130 and downregulated (PHENOTYPE1\_VS\_PHENOTYPE2\_DN) genes are significantly  
131 enriched (FDR<0.01). For example, UP genes in splenic tissue of “control versus *Haemophilus*  
132 *parasuis*-infected pigs” are suppressed (Fig 2B, left heatmap first row), while DN genes are  
133 induced (Fig 2B, right heatmap first row).

134 Overall, this analysis reveals that upregulated genes in “control VS microbial challenge” are  
135 suppressed while downregulated genes are induced. In other words, PMWS lymph nodes  
136 display transcriptomic reprogramming consistent with tissue responses on infectious agents.  
137 This observation is supported by previous findings that naturally occurring PMWS is presented  
138 with concurrent infections [5]. Strikingly, two genomic infection signatures do not follow this  
139 pattern. First, the opposite behavior of the gene signature from *Salmonella Typhimurium* 21  
140 days post inoculation (dpi) suggests that the *Salmonella* infection has already been cleared at  
141 this timepoint. This is indeed the case: at 21dpi the bacterial load in these mesenteric lymph  
142 nodes was reduced to undetectable levels [18]. In contrast, *S. Choleraesuis* infection was  
143 sustained at 21dpi, coinciding with persistent high bacterium abundance in mesenteric lymph  
144 nodes. Intriguingly, the second deviating gene signature originates from pigs that were  
145 subclinically infected with PCV2 (Fig 2A, arrow). Unlike *S. Typhimurium*, this cannot be  
146 explained by pathogen clearance since these experimentally PCV2-infected pigs remained  
147 viremic throughout the original study [19]. Instead, pathogen-distressed host responses  
148 appear here to be repressed in lymph nodes with low-level subclinical PCV2 replication.  
149 Hence, highly expressed genes in “uninfected VS subclinical PCV2-infected” lymph nodes are  
150 induced, while lowly expressed genes are suppressed. From this data, it can be concluded  
151 that subclinical PCV2 infection simulates pathogen-free tissue by reprogramming lymphoid  
152 tissue diametrically opposite to an ongoing infection.

153 Finally, the gene sets PMWS\_VS\_HEALTHY\_UP and PMWS\_VS\_HEALTHY\_DN serve as  
154 positive control since they were derived from the data that was queried in this instance.  
155 PorSignDB signatures from other biological themes may provide additional clues into the  
156 alterations in lymph nodes that are subject to PMWS and could be explored further (Fig S1,  
157 see also discussion).

158

### 159 **An immune response gene signature predicts clinical outcome of PCV2 disease**

160 In an experimental setting, PCV2 alone does not lead to clinical signs. Additional  
161 superinfections or vaccination challenges are needed to produce PMWS [6]. Why extraneous  
162 immunostimulations trigger PMWS remains however poorly understood. A systems-level  
163 dissection of PCV2-affected lymphoid tissue may provide an explanation to this conundrum  
164 because it can determine which transcripts characterize PMWS, unbiased by previous  
165 knowledge. To this extent, the PMWS field study data was divided over a training and  
166 validation cohort, and 173 biomarker genes were selected from the training set using a leave-  
167 one-out cross validation (Fig 3A, Table S1). Together, they reveal a molecular portrait of  
168 PCV2-associated lymphoid lesions. This 'PCV2 disease signature' is greatly induced in the  
169 validation cohort as shown by GSEA analysis, meaning upregulation of PMWS marker genes  
170 and downregulation of Healthy marker genes (Fig 3B). Interestingly, in mediastinal lymph  
171 nodes with subclinical PCV2 at 29dpi, the disease signature is dramatically repressed when  
172 compared to lymph nodes of non-infected counterparts, showing once more that subclinical  
173 PCV2 actively suppresses the transcriptomic recalibration that goes hand in hand with PMWS.  
174 To illustrate the fidelity of the PCV2 disease signature, individual samples were classified as  
175 either PMWS or healthy with the Nearest Template Prediction algorithm [20]. All samples of  
176 the validation set were correctly assigned (FDR <0.05; Fig 3C). Furthermore, all piglets from  
177 the experimental study, either PCV2 free or with subclinical PCV2, were correctly classified  
178 as Healthy with only one sample failing to meet the <0.05 FDR threshold (Fig 3D).  
179 Furthermore, when performing a Gene Ontology overrepresentation test, the PMWS

180 biomarker genes clearly represent the immune response, which confirms from a systems level  
181 that immune activation is a pivotal event in PMWS (Fig S2A). Of note, this gene signature  
182 performs better than an RNMI-based signature (Fig S2B-C), which is more suited for small  
183 sample sizes and was therefore applied for generating PorSignDB.

184 Interestingly, when probing the kinetics of the PCV2 disease signature in lymph nodes of pigs  
185 experimentally infected with PCV2, *S. Typhimurium* or *S. Choleraesuis*, it is clear that these  
186 two bacterial infections promote the disease signature, while in subclinical PCV2 it is  
187 consistently suppressed (Fig 3E-G). In *S. Typhimurium* the reversal of this clinical gene  
188 signature at 21 dpi coincides with the drop of bacterial load in the mesenteric lymph nodes to  
189 almost undetectable degree. This demonstrates from a systems-approach that the infection  
190 has been virtually cleared at this time point, unlike mesenteric lymph nodes upon *S.*  
191 *Choleraesuis* infection, where the persistence of the signature correlates with an enduring  
192 high bacterial lymph node colonization [18].

193 Taken together, PCV2-induced lymphoid depletion and granulomatous inflammation in PMWS  
194 patients can be summarized in a robust gene expression signature emblematic of an enduring  
195 immune activation. Moreover, through an impartial systems-approach, we irrefutably show  
196 that a subclinical PCV2 inoculation provokes a striking suppression of the immune response.

197

## 198 **Functional genomics identify regulatory networks perturbations in PCV2** 199 **disease**

200 It is becoming increasingly clear that PMWS and subclinical PCV2 represent two opposing  
201 adaptations of lymphoid tissue to circoviral infection. The former enhances immune system  
202 activation and fulminant viremia, whereas in the latter the immune system stays deafeningly  
203 silent with only a mild viremia. To understand how this tiny virus arranges this *tour de force*,  
204 the data sets covering both the PMWS field study [17] and the experimentally induced  
205 subclinical PCV2 at 29 dpi [19] were interrogated in the GSEA computational system with the



206 innovative Hallmark gene set collection [21]. This provides a very sensitive overview of  
207 alterations in a number of key regulatory networks and signaling pathways in both PMWS  
208 patients (Fig 4, left column) and pigs with persistent subclinical PCV2 (Fig 4A, right column).  
209 In lymphoid tissue of pigs with PMWS, many of the affected transcriptional networks echo key  
210 events in PCV2-associated lymphopathology such as blatant inflammatory activity (Hallmark  
211 gene set 'Inflammatory response') and caspase-mediated cell death ('Apoptosis'). Increases  
212 in gene expression mediated by p53 ('p53 pathways), reactive oxygen species ('ROS  
213 pathway') and NF- $\kappa$ B ('TNF $\alpha$  signaling through NF $\kappa$ B') reflect findings that PCV2 promotes  
214 p53 expression [22,23] and triggers NF $\kappa$ B activation through ROS [24,25] (Fig 4, left column).  
215 This analysis not only indicates critical adjustments for amplified viral replication, it also  
216 uncovers several previously unknown network modifications. These include immunological  
217 programs ('Interferon alpha response' and 'Interferon gamma response'), cell signaling  
218 cascades ('IL2-STAT5 signaling', 'IL6-JAK-STAT3 signaling', 'KRAS signaling up') and  
219 bioenergetics ('Glycolysis' and 'Hypoxia').

220 Consistent with previous results, subclinical PCV2 infection generally fails to reproduce the  
221 imbalances associated with PMWS (Fig 4, right column). Only the transcriptomic programs  
222 downstream of interferon- $\alpha$  and interferon- $\gamma$  are in line with subclinical infections, suggesting  
223 a direct viral effect on these immunological networks. Most programs are however unaffected  
224 or opposed to the changes occurring in PMWS, reaffirming the running thread that subclinical  
225 PCV2 is unable to reprogram the circuitry to develop PMWS.

226

## 227 **IL-2 supplementation enables *ex vivo* modelling of PCV2 in primary porcine** 228 **lymphoblasts**

229 The transcriptional upregulation of IL-2 responsive genes in PMWS, but not in subclinical  
230 PCV2 (Fig 4A), indicates that fulminant PCV2 replication occurs in an IL-2 infused lymphoid  
231 environment. Given the pivotal role of IL-2 in activated T-cells during immune response [26],

232 IL-2 may indeed be a crucial factor in boosting subclinical PCV2 towards PMWS. Intriguingly,  
233 the IL2-STAT5 signaling network is suppressed in subclinical PCV2, but not in *S. Choleraesuis*  
234 and *S. Typhimurium*, where there is a persistent and transient induction respectively (Fig 5A).  
235 Again, in *S. Typhimurium*, the reversal of the IL-2 signature coincides with bacterial clearance.

236 The impact of IL-2 on PCV2 replication cannot be faithfully demonstrated with traditional PK15  
237 kidney cells. Because PCV2 has a tropism for lymphoblasts, these are the cells of choice. Our  
238 lab previously demonstrated that treatment of freshly harvested PBMCs with concanavalin A  
239 (ConA) coerces T-cells into mitosis, rendering them permissive for PCV2 [27]. Unfortunately,  
240 lymphoblast proliferation can only be maintained for a very short time after which the cells  
241 forfeit viability and die of attrition. Indeed, when isolated lymphocytes are stimulated with ConA  
242 without IL-2, these cells start suffering from apoptosis even before the first passage at 72h.  
243 However, supplementing ConA-stimulated lymphocytes with IL-2 not only mimics the PMWS  
244 microenvironment, it generates continuously expanding primary porcine lymphoblasts (PPLs;  
245 Fig 5B-C). These PPLs can be easily cultured, expanded and infected with PCV2 *ex vivo*,  
246 providing a cell culture platform amenable for studying PMWS pathogenesis (Fig 5D). To  
247 prove the beneficial effect of IL-2 on PCV2 replication, lymphocytes were freshly harvested  
248 from six individual pigs. IL-2 supplementation doubled PCV2 infection rates after 36h, a  
249 timeframe amounting to a single round of replication (Fig 5E). This demonstrates that T-cell  
250 activation by IL-2 fosters PCV2 infection and highlights the potential of PPLs for studying  
251 PMWS.

252

### 253 **STAT3 is a PCV2 host factor and a target for antiviral intervention**

254 Since transcriptional networks of PMWS lymphoid tissue are subject to dramatic changes that  
255 correlate with fulminant PCV2 replication, counteracting these alterations can potentially harm  
256 the viral life cycle. When observing a fierce induction of gene expression downstream the IL6-  
257 JAK-STAT3 signaling cascade in PCV2 patients (Fig S2A), STAT3 emerges as a druggable

258 candidate host factor. Interestingly, STAT3 is a key regulator of inflammation often exploited  
259 by viruses with pathogenic consequences [28]. In a drug assay, treatment with selective  
260 STAT3 inhibitor Cpd188 exhibits a dose-dependent effect on PCV2 infection in PPLs at 72 hpi  
261 (Fig 6A). Cell viability assay reveals no toxicity, excluding non-specific adverse effects of the  
262 compound on infection (Fig 6B). Chemical inhibition also displays a dose-dependent effect on  
263 PCV2 infection in PK15 cells (Fig S2B-D). Thus, robust expression of STAT3 responsive  
264 genes are critical for PCV2, and hampering STAT3 activity represents an antiviral strategy  
265 (Fig 6C).

266

## 267 **A paracrine macrophage-lymphoblast communication axis exacerbates PCV2** 268 **infection**

269 Finally, the PMWS field study dataset was queried in GSEA with ImmuneSigDB's  
270 immunological gene signatures [13]. This revealed a striking suppression of lymphocyte gene  
271 expression and powerful induction of signatures from monocytes and other myeloid cells (Fig  
272 7A, Table S2), reflecting the loss of lymphocytes and histiocytic replacement in PMWS lymph  
273 nodes. This raises the question to what extent infiltrating monocytes affect PCV2 replication.  
274 After maturation into macrophages, they may either dampen infection by destroying viral  
275 particles, or promote PCV2 in a paracrine fashion by releasing pro-inflammatory cytokines. To  
276 test the effect of intercellular communication between macrophages and lymphocytes, a co-  
277 culture experiment was set up. PCV2-infected PPLs were seeded in a porous insert, physically  
278 separated from a lower compartment with primary porcine macrophages (Fig 7B). The latter  
279 were challenged with Porcine Reproductive and Respiratory Syndrome Virus (PRRSV), a  
280 virus that can experimentally trigger PMWS [6] (Fig 7C). The presence of non-infected  
281 macrophages had no significant effect on PCV2 lymphoblast infection levels, but when co-  
282 cultured with PRRSV-infected macrophages, a significant and consistent increase in PCV2  
283 infection could be discerned (Fig 7D). This demonstrates the existence of a previously

284 unknown axis of intercellular communication between macrophages and lymphoblasts  
285 exacerbating PCV2 replication.

286

## 287 **Discussion**

288 Systems biology approaches aim to model regulatory networks from genome-wide  
289 transcriptional profiles as a large interconnected switchboard where many small inputs  
290 combine to execute large programs. In response to extra- or intracellular stimuli, cells will  
291 modify their circuitry in an orchestrated effort to adapt to their environment. These days,  
292 mapping genome-wide transcripts for biological network analysis has become fast, cheap and  
293 easy. Especially when deposited in public databases, it provides an ever-growing library of  
294 transcriptomes. Here we unlock the potential of porcine microarray studies by turning it into  
295 an atlas of tissue transcripts for bioinformatical analysis, extending the MSigDB database with  
296 *in vivo* derived profiles [29]. Prior mapping of porcine microarray probes to human orthologs  
297 facilitates its application to any mammalian gene expression data set.

298 PorSignDB is especially convenient for delineating which physiological state one's samples of  
299 interest resemble, generating useful hypotheses in the process. When applied to PCV2 patient  
300 data, it elegantly exposes the transcriptomic bedrock underlying circoviral persistence: PCV2  
301 reprograms lymph node circuitry into a state of non-infection as a strategy for establishing  
302 covert chronic infection. We hereby postulate the mechanics of how PCV2 operates in swine  
303 livestock. In an initial phase, PCV2 functionally silences the immune response, delaying or  
304 even completely abrogating an adaptive antibody response [30]. This recalibration allows only  
305 low-level PCV2 replication but does result in viral persistence without clinical signs. Only when  
306 PCV2's input on host transcriptomics is overturned by a severe superinfection are  
307 inflammatory networks and STAT3 responsive gene expression engaged. This immune  
308 activation infuses lymphoid tissue with IL-2 to activate T-cells into lymphoblasts, triggering  
309 fulminant circoviral replication and widespread lymphocyte apoptosis. When macrophages

310 rush in to help, their paracrine signaling exacerbates PCV2 replication even further. Moreover,  
311 PCV2 capsids resist destruction by macrophages, which fuse together into histiocytic giant  
312 cells in an ineffective last-ditch effort to stem the infection. PMWS is thus the end-stage of a  
313 lethal viral lymph node disease, where germinal centers have collapsed and functional  
314 parenchyma is replaced by macrophages, leading to a structural immune deficiency.

315 Confronted with the evidence that subclinical PCV2 and PMWS are two different host  
316 reactions to PCV2, we deem it important to discriminate between these two phenotypes of  
317 'PCV2 infection'. Treating them as a single entity will only result in conflicting data. As an  
318 example, this integrative transcriptional analysis resolves the long-standing dichotomy in  
319 PMWS pathology of whether or not apoptosis is implicated in lymphoid depletion *in vivo* [31–  
320 33]. In lymphoid tissue with low-level replication, it is not. On the other hand, in lymph nodes  
321 collapsing under PCV2, genes mediating apoptosis are in full force (Fig 4).

322 Another example of PorSignDB generating intriguing hypotheses, is that weaned gut gene  
323 expression signatures are induced in clinical PCV2, while intestinal signatures of suckling  
324 piglets are suppressed (Fig S1). It suggests that as long as intestinal tissue is protected by  
325 maternal antibodies, progression to PMWS is obstructed. On the other hand, when weaned,  
326 naive intestinal tissue makes immunological contact with pathogens, producing a  
327 microenvironment that reflects PMWS and hence, can promote PCV2.

328 Finally, the pronounced IL-2 signature in clinical PCV2 inspired the establishment of primary  
329 lymphoblast strains. They can be easily expanded and stored in liquid nitrogen, and display  
330 excellent post-thaw survival. Unlike PK-15 cells, they can be harvested from different  
331 individuals or breeds, providing a new and valuable tool for studying the long-suspected  
332 impact of genetic background on PCV2 disease [34,35].

333 In conclusion, we here solve a long-standing enigma of how PCV2 establishes subclinical  
334 persistence, and how it switches to clinical disease. Upon infection, host tissue is instructed  
335 to act as if the pathogen is absent, allowing PCV2 to replicate covertly at modest rates.

336 Whenever an individual falls victim to a stimulus that rewires the transcriptional circuitry into  
337 immune activation, PCV2 replicates frantically and overwhelms the host. Given its limited  
338 coding capacity, PCV2 cannot manage it alone but depends on superinfections to recalibrate  
339 the host. This elegantly explains how PCV2 circulates in pig farms, and settles the  
340 controversies that have haunted PCV2 pathologists.

341

## 342 **Materials and methods**

### 343 **Generating PorSignDB**

344 Raw Affymetrix Porcine Genechip data were retrieved from NCBI GEO  
345 (<http://www.ncbi.nlm.nih.gov/geo/>). Data covering pooled samples or lacking publication on  
346 Pubmed were discarded, as were studies with <2 samples per phenotype. Quantile  
347 normalized expression data was generated from .CEL files using the ExpressionFileCreator  
348 module on Genepattern [36]. Affymetrix probe set identifiers were mapped to Homo sapiens  
349 gene symbols as previously described [37] with Refseq and Uniprot identifiers were changed  
350 into corresponding gene symbols. Early transcriptional responses (<30 mins) and  
351 comparisons between breeds or tissue types were ignored. If controls were unavailable for  
352 temporal studies, comparisons were made with t=0. For signature generation, the  
353 ImmuneSigDB recipe [13] was followed. Briefly, genes were correlated to a target profile and  
354 ranked using the RNMI metric [38]. Top and bottom ranked genes with an FDR <0.01 in a  
355 permutation test were included in two gene sets, with maximally 200 genes each, yielding  
356 PHENOTYPE1\_VS\_PHENOTYPE2\_UP" and "PHENOTYPE1\_VS\_PHENOTYPE2\_DN".

357

### 358 **PCV2 disease signature and phenotype classification**

359 Biomarker genes were calculated from data of a field study covering three different cohorts  
360 [17], according to a previously described method [7] with minor modifications. Cohorts were  
361 divided over a training set (n=17) and a validation set (n=8). Marker genes were ranked in the

362 training set using signal-to-noise ratio (S2NR), with standard deviations adjusted to minimally  
363  $0.2 \times \text{mean}$ . In a subsequent leave-one-out cross validation, a single sample was left out and a  
364 permutation test was performed on the remaining samples. Only genes with  $p < 0.05$  in every  
365 iterative leave-one-out trial were included in the signature. For phenotype classification, the  
366 NTP algorithm [20] was employed with S2NR as weights.

367

## 368 **Cells, virus and reagents**

369 PK15 kidney cells were a kind gift of Gordon Allan, Queen's University, Belfast, UK. PK15  
370 culture conditions were described earlier [39]. To generate PPLs, PBMCs were isolated as  
371 described previously (Lefebvre *et al.*, 2008b). After adhering of monocytes to a plastic culture  
372 flask, lymphocytes in suspension were pelleted, resuspended in culture medium  
373 supplemented with 5  $\mu\text{g/ml}$  ConA (Sigma) and 50  $\mu\text{M}$   $\beta$ -mercaptoethanol (Gibco). After three  
374 days, cells were pelleted, washed with RPMI (Gibco), and resuspended in culture medium  
375 supplemented with 100 U/ml human recombinant IL-2 (NIH) and 50  $\mu\text{M}$   $\beta$ -mercaptoethanol.  
376 Porcine alveolar macrophages were isolated as described [40]. Animal procedures were  
377 approved by Ghent University ethical committee EC2013/97. PCV2 strains 1121 and  
378 Stoon1010 were described previously [41]. PRRSV Lelystad strain was described earlier [40].  
379 Cpd188 was ordered from Merck Millipore.

380

## 381 **Experimental infection and immunostaining**

382 PK-15 and PPLs were inoculated with PCV2 1121 at 0.1  $\text{TCID}_{50}/\text{cell}$  for 1h, washed and further  
383 incubated in culture medium for 36h. For Cpd188 experiments, cells were pre-incubated for  
384 1 hour with Cpd188 (Merck Millipore) dissolved in 0.25 % DMSO. Subsequently, cells were  
385 inoculated with PCV2 at 0.1  $\text{TCID}_{50}/\text{cell}$  for 1h, washed and incubated for 72h. For co-culture,  
386 PPLs and macrophages were inoculated at 0.5  $\text{TCID}_{50}/\text{cell}$  for 1h with PCV2 Stoon1010 and

387 PRRSV respectively, washed and incubated for 72h. PCV2 capsid immunostaining with mAb  
388 38C1 was described earlier (Huang *et al.*, 2015).

389

## 390 **Acknowledgements**

391 We thank Joaquín Segalés and Lana T. Fernandes for sharing clinical data, Hussein El-  
392 Saghire, Gerben Menschaert and Eloi E.R. Verrier for helpful discussions, and Carine Boone  
393 for technical assistance.

394

## 395 **References**

- 396 1. Segalés J. Porcine circovirus type 2 (PCV2) infections: clinical signs, pathology and  
397 laboratory diagnosis. *Virus Res.* 2012;164: 10–19. doi:10.1016/j.virusres.2011.10.007
- 398 2. Darwich L, Mateu E. Immunology of porcine circovirus type 2 (PCV2). *Virus Res.*  
399 2012;164: 61–67. doi:10.1016/j.virusres.2011.12.003
- 400 3. Opriessnig T, Prickett JR, Madson DM, Shen H-G, Juhan NM, Pogranichniy RR, et al.  
401 Porcine circovirus type 2 (PCV2)-infection and re-inoculation with homologous or  
402 heterologous strains: virological, serological, pathological and clinical effects in growing  
403 pigs. *Vet Res.* 2010;41: 31. doi:10.1051/vetres/2010003
- 404 4. Xiao C-T, Harmon KM, Halbur PG, Opriessnig T. PCV2d-2 is the predominant type of  
405 PCV2 DNA in pig samples collected in the U.S. during 2014-2016. *Vet Microbiol.*  
406 2016;197: 72–77. doi:10.1016/j.vetmic.2016.11.009
- 407 5. Opriessnig T, Halbur PG. Concurrent infections are important for expression of porcine  
408 circovirus associated disease. *Virus Res.* 2012;164: 20–32.  
409 doi:10.1016/j.virusres.2011.09.014
- 410 6. Tomás A, Fernandes LT, Valero O, Segalés J. A meta-analysis on experimental  
411 infections with porcine circovirus type 2 (PCV2). *Vet Microbiol.* 2008;132: 260–273.  
412 doi:10.1016/j.vetmic.2008.05.023
- 413 7. Hoshida Y, Villanueva A, Kobayashi M, Peix J, Chiang DY, Camargo A, et al. Gene  
414 expression in fixed tissues and outcome in hepatocellular carcinoma. *N Engl J Med.*  
415 2008;359: 1995–2004. doi:10.1056/NEJMoa0804525
- 416 8. van de Vijver MJ, He YD, van't Veer LJ, Dai H, Hart AAM, Voskuil DW, et al. A gene-  
417 expression signature as a predictor of survival in breast cancer. *N Engl J Med.*  
418 2002;347: 1999–2009. doi:10.1056/NEJMoa021967



- 419 9. Golub TR, Slonim DK, Tamayo P, Huard C, Gaasenbeek M, Mesirov JP, et al.  
420 Molecular classification of cancer: class discovery and class prediction by gene  
421 expression monitoring. *Science*. 1999;286: 531–537.
- 422 10. Hoshida Y, Nijman SMB, Kobayashi M, Chan JA, Brunet J-P, Chiang DY, et al.  
423 Integrative transcriptome analysis reveals common molecular subclasses of human  
424 hepatocellular carcinoma. *Cancer Res*. 2009;69: 7385–7392. doi:10.1158/0008-  
425 5472.CAN-09-1089
- 426 11. Lamb J, Crawford ED, Peck D, Modell JW, Blat IC, Wrobel MJ, et al. The Connectivity  
427 Map: using gene-expression signatures to connect small molecules, genes, and  
428 disease. *Science*. 2006;313: 1929–1935. doi:10.1126/science.1132939
- 429 12. Subramanian A, Narayan R, Corsello SM, Peck DD, Natoli TE, Lu X, et al. A Next  
430 Generation Connectivity Map: L1000 Platform and the First 1,000,000 Profiles. *Cell*.  
431 2017;171: 1437-1452.e17. doi:10.1016/j.cell.2017.10.049
- 432 13. Godec J, Tan Y, Liberzon A, Tamayo P, Bhattacharya S, Butte AJ, et al. Compendium  
433 of Immune Signatures Identifies Conserved and Species-Specific Biology in Response  
434 to Inflammation. *Immunity*. 2016;44: 194–206. doi:10.1016/j.immuni.2015.12.006
- 435 14. Wang Y, Couture OP, Qu L, Uthe JJ, Bearson SMD, Kuhar D, et al. Analysis of porcine  
436 transcriptional response to *Salmonella enterica* serovar *Choleraesuis* suggests novel  
437 targets of NFkappaB are activated in the mesenteric lymph node. *BMC Genomics*.  
438 2008;9: 437. doi:10.1186/1471-2164-9-437
- 439 15. Lu Y, Huggins P, Bar-Joseph Z. Cross species analysis of microarray expression data.  
440 *Bioinformatics*. 2009;25: 1476–1483. doi:10.1093/bioinformatics/btp247
- 441 16. Kristiansson E, Österlund T, Gunnarsson L, Arne G, Larsson DGJ, Nerman O. A novel  
442 method for cross-species gene expression analysis. *BMC Bioinformatics*. 2013;14: 70.  
443 doi:10.1186/1471-2105-14-70
- 444 17. Fernandes LT, Tomás A, Bensaid A, Sibila M, Sánchez A, Segalés J. Microarray  
445 analysis of mediastinal lymph node of pigs naturally affected by postweaning  
446 multisystemic wasting syndrome. *Virus Res*. 2012;165: 134–142.  
447 doi:10.1016/j.virusres.2012.02.006
- 448 18. Uthe JJ, Royae A, Lunney JK, Stabel TJ, Zhao S-H, Tuggle CK, et al. Porcine  
449 differential gene expression in response to *Salmonella enterica* serovars *Choleraesuis*  
450 and *Typhimurium*. *Mol Immunol*. 2007;44: 2900–2914.  
451 doi:10.1016/j.molimm.2007.01.016
- 452 19. Tomás A, Fernandes LT, Sánchez A, Segalés J. Time course differential gene  
453 expression in response to porcine circovirus type 2 subclinical infection. *Vet Res*.  
454 2010;41: 12. doi:10.1051/vetres/2009060
- 455 20. Hoshida Y. Nearest template prediction: a single-sample-based flexible class prediction  
456 with confidence assessment. *PLoS ONE*. 2010;5: e15543.  
457 doi:10.1371/journal.pone.0015543
- 458 21. Liberzon A, Birger C, Thorvaldsdóttir H, Ghandi M, Mesirov JP, Tamayo P. The  
459 Molecular Signatures Database (MSigDB) hallmark gene set collection. *Cell Syst*.  
460 2015;1: 417–425. doi:10.1016/j.cels.2015.12.004

- 461 22. Karuppanan AK, Liu S, Jia Q, Selvaraj M, Kwang J. Porcine circovirus type 2 ORF3  
462 protein competes with p53 in binding to Pirh2 and mediates the deregulation of p53  
463 homeostasis. *Virology*. 2010;398: 1–11. doi:10.1016/j.virol.2009.11.028
- 464 23. Liu J, Zhu Y, Chen I, Lau J, He F, Lau A, et al. The ORF3 protein of porcine circovirus  
465 type 2 interacts with porcine ubiquitin E3 ligase Pirh2 and facilitates p53 expression in  
466 viral infection. *J Virol*. 2007;81: 9560–9567. doi:10.1128/JVI.00681-07
- 467 24. Chen X, Ren F, Hesketh J, Shi X, Li J, Gan F, et al. Reactive oxygen species regulate  
468 the replication of porcine circovirus type 2 via NF- $\kappa$ B pathway. *Virology*. 2012;426: 66–  
469 72. doi:10.1016/j.virol.2012.01.023
- 470 25. Wei L, Kwang J, Wang J, Shi L, Yang B, Li Y, et al. Porcine circovirus type 2 induces  
471 the activation of nuclear factor kappa B by IkappaBalpha degradation. *Virology*.  
472 2008;378: 177–184. doi:10.1016/j.virol.2008.05.013
- 473 26. Boyman O, Sprent J. The role of interleukin-2 during homeostasis and activation of the  
474 immune system. *Nat Rev Immunol*. 2012;12: 180–190. doi:10.1038/nri3156
- 475 27. Lefebvre DJ, Meerts P, Costers S, Misinzo G, Barbé F, Van Reeth K, et al. Increased  
476 porcine circovirus type 2 replication in porcine leukocytes in vitro and in vivo by  
477 concanavalin A stimulation. *Vet Microbiol*. 2008;132: 74–86.  
478 doi:10.1016/j.vetmic.2008.05.004
- 479 28. Roca Suarez AA, Van Renne N, Baumert TF, Lupberger J. Viral manipulation of  
480 STAT3: Evade, exploit, and injure. *PLoS Pathog*. 2018;14: e1006839.  
481 doi:10.1371/journal.ppat.1006839
- 482 29. Liberzon A, Subramanian A, Pinchback R, Thorvaldsdóttir H, Tamayo P, Mesirov JP.  
483 Molecular signatures database (MSigDB) 3.0. *Bioinformatics*. 2011;27: 1739–1740.  
484 doi:10.1093/bioinformatics/btr260
- 485 30. Opriessnig T, Gerber PF, Matzinger SR, Meng X-J, Halbur PG. Markedly different  
486 immune responses and virus kinetics in littermates infected with porcine circovirus type  
487 2 or porcine parvovirus type 1. *Vet Immunol Immunopathol*. 2017;191: 51–59.  
488 doi:10.1016/j.vetimm.2017.08.003
- 489 31. Lin C-M, Jeng C-R, Hsiao S-H, Liu J-P, Chang C-C, Chiou M-T, et al.  
490 Immunopathological characterization of porcine circovirus type 2 infection-associated  
491 follicular changes in inguinal lymph nodes using high-throughput tissue microarray. *Vet*  
492 *Microbiol*. 2011;149: 72–84. doi:10.1016/j.vetmic.2010.10.018
- 493 32. Resendes AR, Majó N, Segalés J, Mateu E, Calsamiglia M, Domingo M. Apoptosis in  
494 lymphoid organs of pigs naturally infected by porcine circovirus type 2. *J Gen Virol*.  
495 2004;85: 2837–2844. doi:10.1099/vir.0.80221-0
- 496 33. Shibahara T, Sato K, Ishikawa Y, Kadota K. Porcine circovirus induces B lymphocyte  
497 depletion in pigs with wasting disease syndrome. *J Vet Med Sci*. 2000;62: 1125–1131.
- 498 34. Opriessnig T, Fenaux M, Thomas P, Hoogland MJ, Rothschild MF, Meng XJ, et al.  
499 Evidence of breed-dependent differences in susceptibility to porcine circovirus type-2-  
500 associated disease and lesions. *Vet Pathol*. 2006;43: 281–293. doi:10.1354/vp.43-3-  
501 281

- 502 35. Opriessnig T, Patterson AR, Madson DM, Pal N, Rothschild M, Kuhar D, et al.  
503 Difference in severity of porcine circovirus type two-induced pathological lesions  
504 between Landrace and Pietrain pigs. *J Anim Sci.* 2009;87: 1582–1590.  
505 doi:10.2527/jas.2008-1390
- 506 36. Reich M, Liefeld T, Gould J, Lerner J, Tamayo P, Mesirov JP. GenePattern 2.0. *Nat*  
507 *Genet.* 2006;38: 500–501. doi:10.1038/ng0506-500
- 508 37. Tsai S, Cassady JP, Freking BA, Nonneman DJ, Rohrer GA, Piedrahita JA. Annotation  
509 of the Affymetrix porcine genome microarray. *Anim Genet.* 2006;37: 423–424.  
510 doi:10.1111/j.1365-2052.2006.01460.x
- 511 38. Cowley GS, Weir BA, Vazquez F, Tamayo P, Scott JA, Rusin S, et al. Parallel genome-  
512 scale loss of function screens in 216 cancer cell lines for the identification of context-  
513 specific genetic dependencies. *Sci Data.* 2014;1: 140035. doi:10.1038/sdata.2014.35
- 514 39. Huang L, Van Renne N, Liu C, Nauwynck HJ. A sequence of basic residues in the  
515 porcine circovirus type 2 capsid protein is crucial for its co-expression and co-  
516 localization with the replication protein. *J Gen Virol.* 2015;96: 3566–3576.  
517 doi:10.1099/jgv.0.000302
- 518 40. Labarque GG, Nauwynck HJ, Van Reeth K, Pensaert MB. Effect of cellular changes  
519 and onset of humoral immunity on the replication of porcine reproductive and  
520 respiratory syndrome virus in the lungs of pigs. *J Gen Virol.* 2000;81: 1327–1334.  
521 doi:10.1099/0022-1317-81-5-1327
- 522 41. Lefebvre DJ, Costers S, Van Doorselaere J, Misinzo G, Delputte PL, Nauwynck HJ.  
523 Antigenic differences among porcine circovirus type 2 strains, as demonstrated by the  
524 use of monoclonal antibodies. *J Gen Virol.* 2008;89: 177–187. doi:10.1099/vir.0.83280-  
525 0

526

## 527 **Supporting Information Legends**

528 **Figure S1** PorSignDB performance in lymph nodes of PMWS pigs VS healthy pigs. Figure  
529 displays enriched PorSignDB gene sets in the PMWS study pertaining to biological themes  
530 other than microbiology.

531

532 **Figure S2** PMWS biomarker genes annotation and performance of an alternative clinical  
533 disease signature. **A** Gene ontology (GO) terms overrepresentation test of PMWS biomarker  
534 genes. **B** Nearest Template Prediction of test set samples using an alternative clinical gene  
535 signature based on the RNMI metric **C** and similarly, of the experimental subclinical infection  
536 samples at 29dpi.

537

538 **Figure S3** STAT3 is a host factor in PCV2 disease. **A** Core genes responsible for the STAT3  
539 signature enrichment score. **B** STAT3-specific inhibitor cpd-188 impairs infection in PK-15  
540 cells. Means  $\pm$  sd represents three independent experiments in triplicate (n=9; \*\*P<0.01,  
541 \*\*\*P<0.001, Mann-Whitney U-Test). **C** MTT cell viability assay of cpd-188 treatment in PK-15  
542 cells. Means  $\pm$  sd are shown for three independent experiments in quintuplicate (n=15). **D**  
543 Infection assessment by PCV2 capsid immunostaining, representative figures for each  
544 treatment. Scale bar: 100  $\mu$ m.

545

546 **Table S1** Complete list of PCV2 disease signature biomarker genes.

547

548 **Table S2** ImmuneSigDB analysis of the PMWS field study dataset.

549

## 550 **Figure legends**

551 **Figure 1** Details of PorSignDB. **A** Overview of the pipeline. 88 curated studies with data from  
552 1776 microarrays chips were retrieved from the GEO repository. Data from each study was  
553 uniformly normalized using Genepattern, and gene expression signatures representing each  
554 phenotype of every pairwise comparison were calculated in R. Systematical annotations were  
555 added to every signature, yielding 412 gene sets. **B** Example of signature generation.  
556 GSE7313 is a study mapping transcript abundance in mesenteric lymph nodes of pigs infected  
557 with *Salmonella Typhimurium* at different time points. The first pair compares data from lymph  
558 nodes of uninfected pigs (Phenotype1) with those of pigs 8h post *S. Typhimurium* infection  
559 (Phenotype2). Significantly upregulated and downregulated genes were selected with a  
560 mutual-information based metric, respectively recapitulating highly expressed genes in the  
561 'uninfected' phenotype (UP gene set), and highly expressed genes in the '8h post *S.*

562 *Typhimurium* infection' phenotype (DN gene set). **C** Samples were derived from a variety of  
563 different tissues, **D** covering studies in a wide range of different biological themes.

564 **Figure 2** Application of PorSignDB to lymph node data originating from pig farms with naturally  
565 occurring PMWS. **A** Outline of the analysis. Data from PMWS-affected farms were retrieved  
566 from GEO. In PMWS lymph nodes, follicular structures become indistinct and B-cells and T-  
567 cells all but disappear, while infiltrating macrophages fuse into multi-nucleated giant cells. In  
568 PCV2-positive healthy lymph nodes, lymphoid structure is intact. Comparing transcriptomes  
569 of both phenotypes using GSEA displays enrichment of PorSignDB transcriptional signatures.  
570 **B** Microbiology-related PorSignDB gene set expression in lymph nodes of PMWS pigs versus  
571 Healthy pigs (FDR<0.01 and opposite expression of each pairwise phenotype). The average  
572 expression of the leading-edge genes in every gene set (genes that contribute to the  
573 enrichment) are displayed for each patient sample. Bars next to each gene set indicate the  
574 signed FDR for its enrichment in log10 scale.

575 **Figure 3** A patient-derived immune response signature predicts clinical outcome of PCV2  
576 infection. **A** Diagram of cohort division between training and test set. A clinical PCV2 signature  
577 was calculated from the training samples and **B** tested in the validation samples by GSEA.  
578 The PCV2 disease signature was markedly induced in the validation set, and repressed in  
579 subclinical PCV2 29dpi. **C** Nearest Template Prediction of test set samples, classifying them  
580 either as healthy (blue) or PMWS (red), and **D** similarly, of the experimental subclinical  
581 infection samples at 29dpi. **E-G** Kinetics of the PCV2 disease signature upon experimental  
582 PCV2, *S. Typhimurium* and *S. Choleraesuis* infection.

583 **Figure 4** Functional genetic networks of the Hallmark gene set collection that are markedly  
584 altered in lymph nodes of pigs with PCV2. Left column: expression level in lymph nodes of  
585 PMWS patients (FDR<0.01). Right column: expression-level of these biological circuits in  
586 Subclinical PCV2 at 29dpi.

587 **Figure 5** IL-2 is implicated in PCV2 disease. **A** Kinetics of IL-2 responsive gene expression  
588 (Hallmark IL2-STAT5 SIGNALING) upon three microbial infections: PCV2 (blue), *S.*  
589 *Typhimurium* (orange) and *S. Choleraesuis* (green). **B** IL-2 activation of freshly isolated and  
590 ConA-stimulated lymphocytes maintains exponential cellular proliferation, yielding primary  
591 porcine lymphoblast (PPL) cell strains. Means  $\pm$  sd represent one experiment in triplicate  
592 (n=3). **C** Representative image of proliferating PLLs. Scale bar: 50  $\mu$ m. **D** PCV2 Cap  
593 immunostaining in PLLs 36hpi. Scale bar: 100  $\mu$ m. **E** IL-2 supplementation doubles PCV2  
594 infection after a single round of replication (36 hpi). Dot blot shows six single independent  
595 experiments with horizontal line indicating median value (n=6; \*\*P<0.01, two-tailed Mann-  
596 Whitney). PPL cell strains were generated from six different individuals.

597 **Figure 6** STAT3 is a PCV2 host factor. **A** STAT3-specific inhibitor Cpd188 impairs infection  
598 in PPLs. Means  $\pm$  sd represent three independent experiments in triplicate (n=9; \*P<0.05,  
599 \*\*P<0.01, two-tailed Mann-Whitney). **B** MTT lymphoblast viability assay of Cpd188 treatment.  
600 Means  $\pm$  sd are shown for three experiments in quintuplicate (n=15). **C** Cartoon outlining  
601 STAT3 as a drugable host factor for PCV2 in lymphoblasts.

602 **Figure 7** Superinfection increases PCV2 replication through a macrophage-lymphoblast  
603 paracrine signaling axis. **A** ImmuneSigDB gene set expression in the PMWS field study  
604 (FDR<0.01 and opposite expression of each pairwise phenotype). The average expression of  
605 the leading-edge genes in every gene set (genes that contribute to the enrichment) are  
606 displayed for each patient sample. Bars next to each gene set indicate the signed FDR for its  
607 enrichment in log10 scale. PMWS versus healthy lymph node comparison displays a dramatic  
608 repression of lymphocyte gene expression signatures, and induction of myeloid cell  
609 signatures. **B** Experimental set-up of PPL-macrophage co-culture system mimicking PMWS  
610 lymph nodes. **C** PCV2-inoculated PPLs were seeded on a porous insert with macrophages at  
611 the bottom of the well. Macrophages were additionally challenged with PRRSV at 0h. **D**  
612 Relative PPL infection levels at 72hpi. Means  $\pm$  sd represent two independent experiments in  
613 triplicate (n=6; \*P<0.05, two-tailed Mann-Whitney).



**Figure 1**

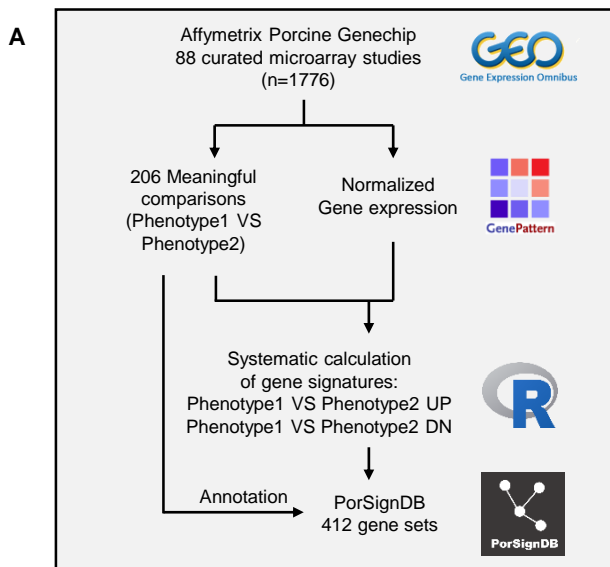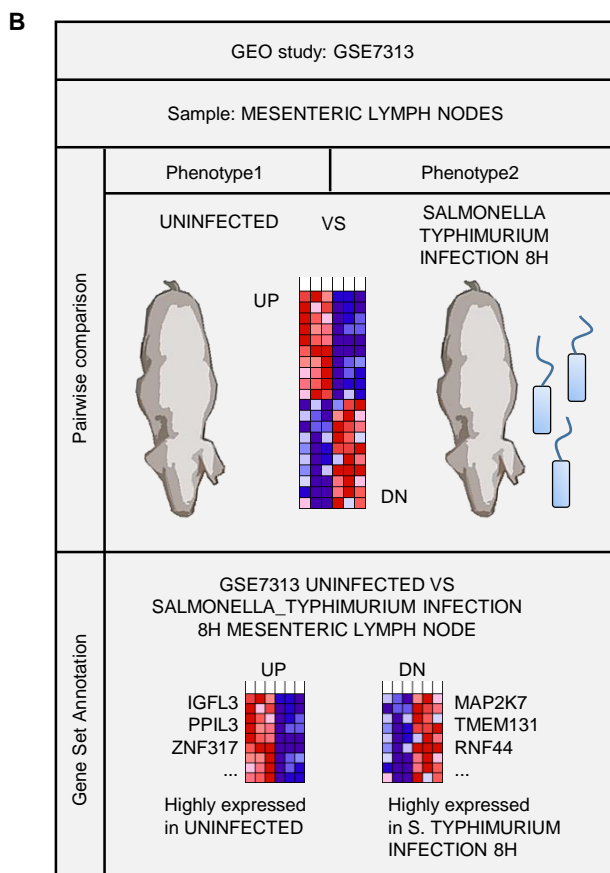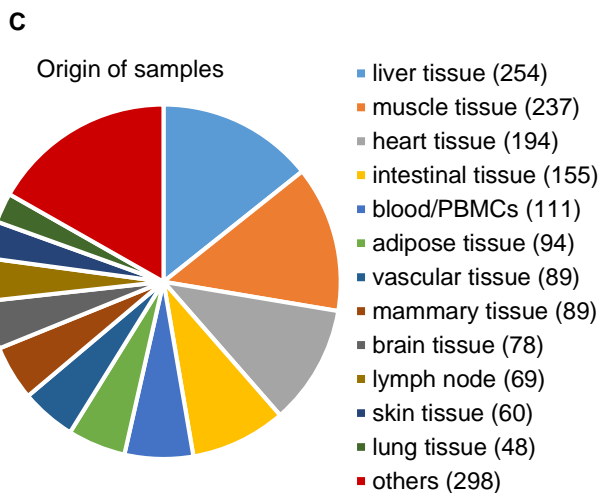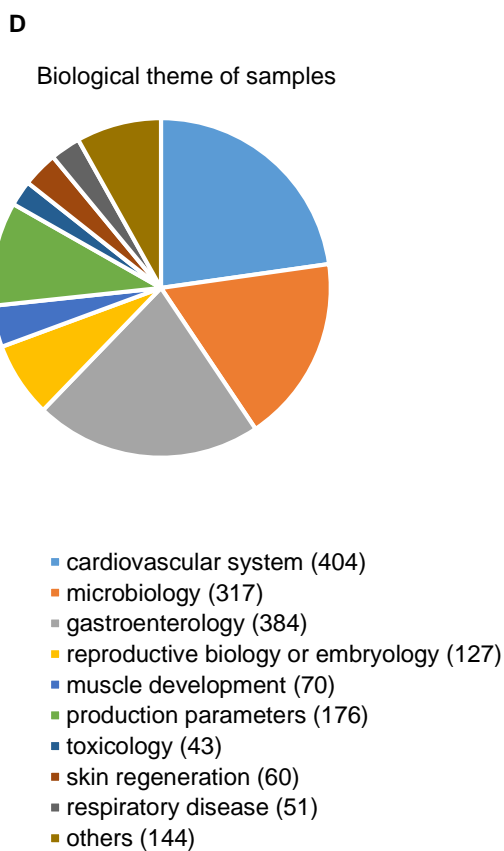



A

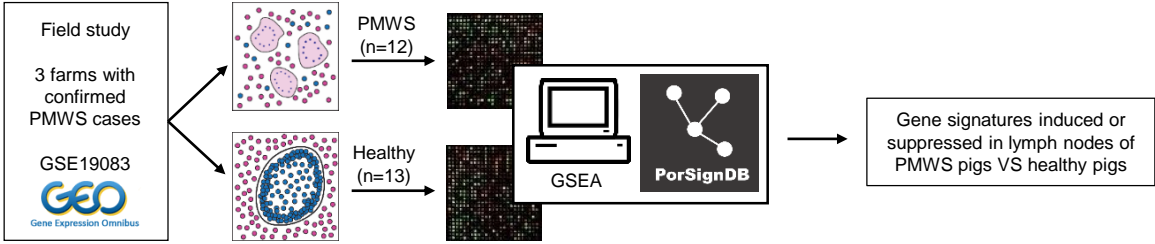

B PorSignDB performance in lymph nodes of PMWS pigs VS healthy pigs

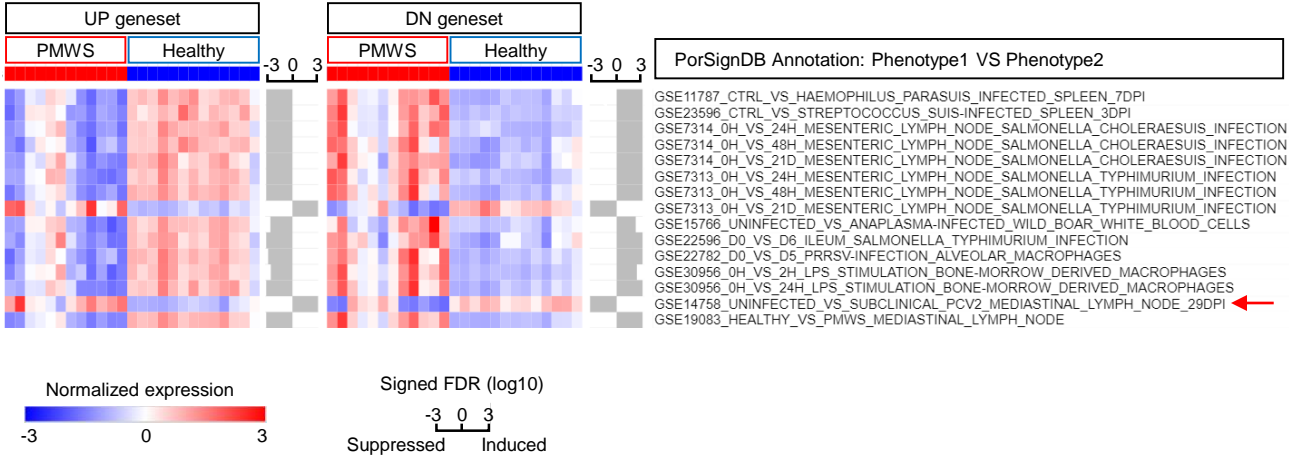

**Figure 3**

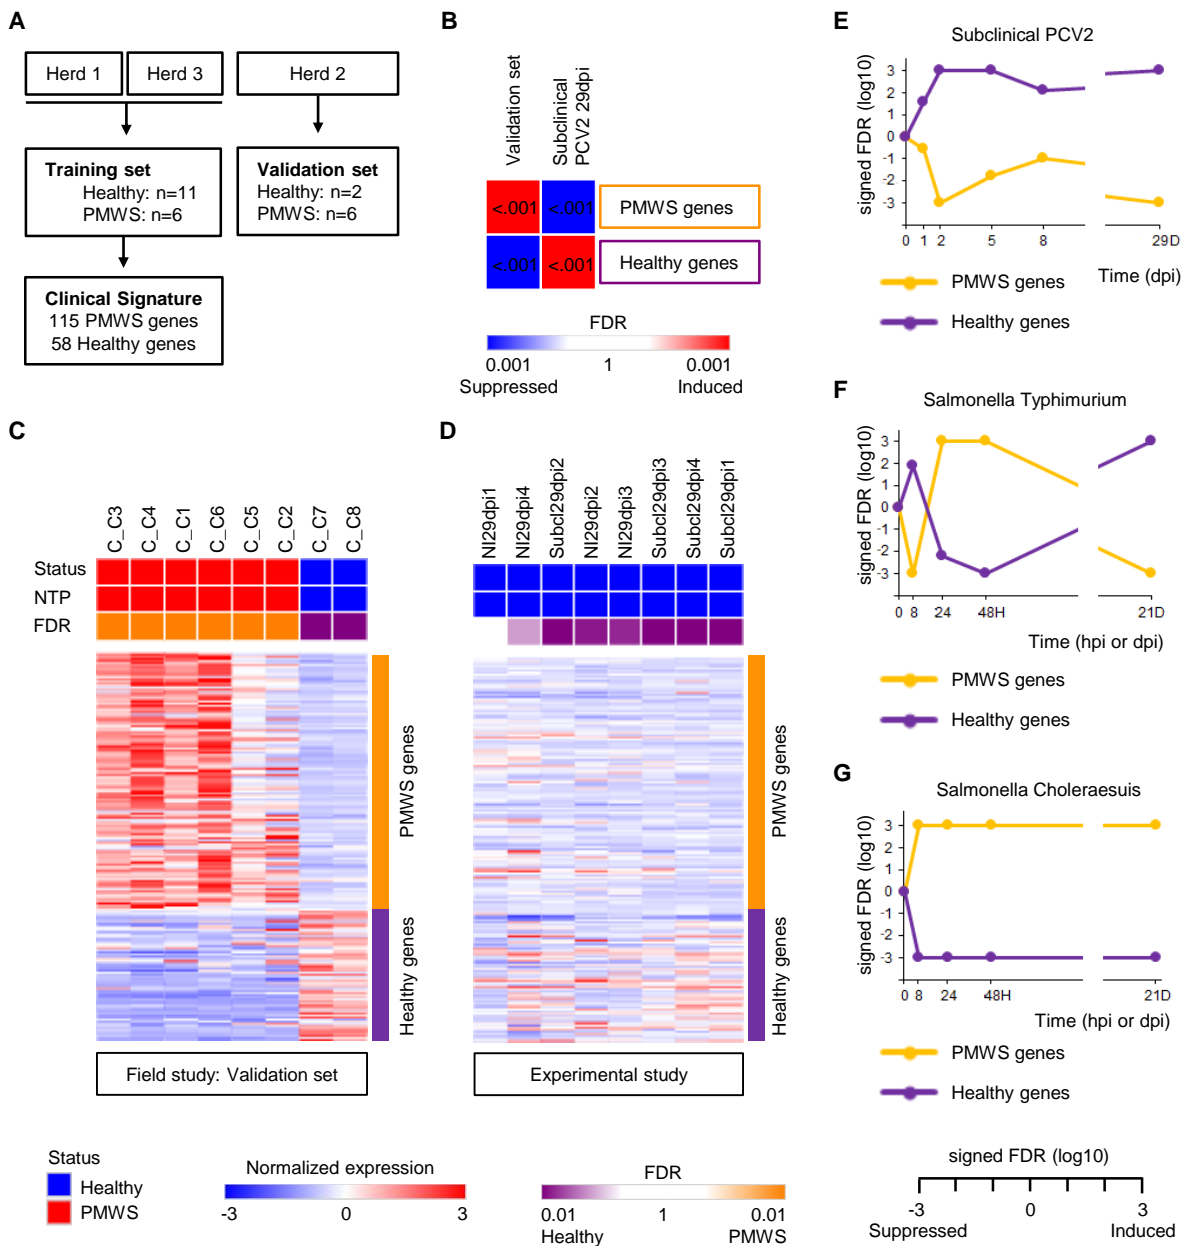

Figure 4

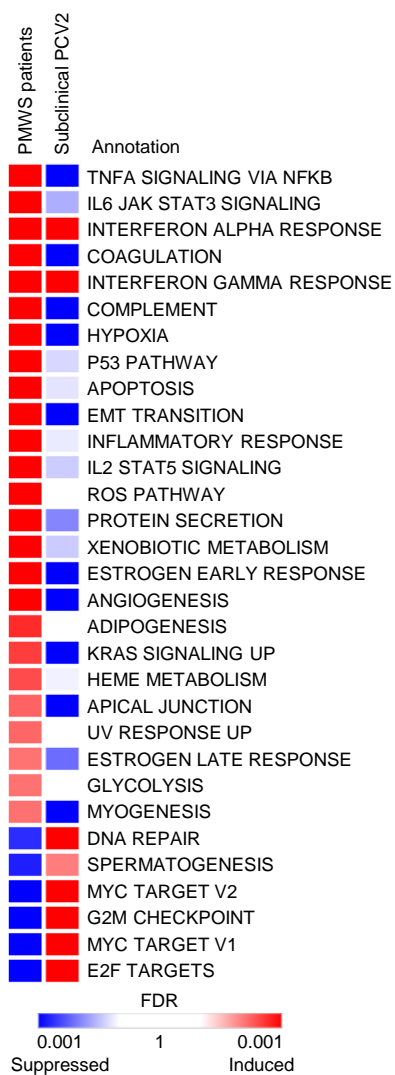

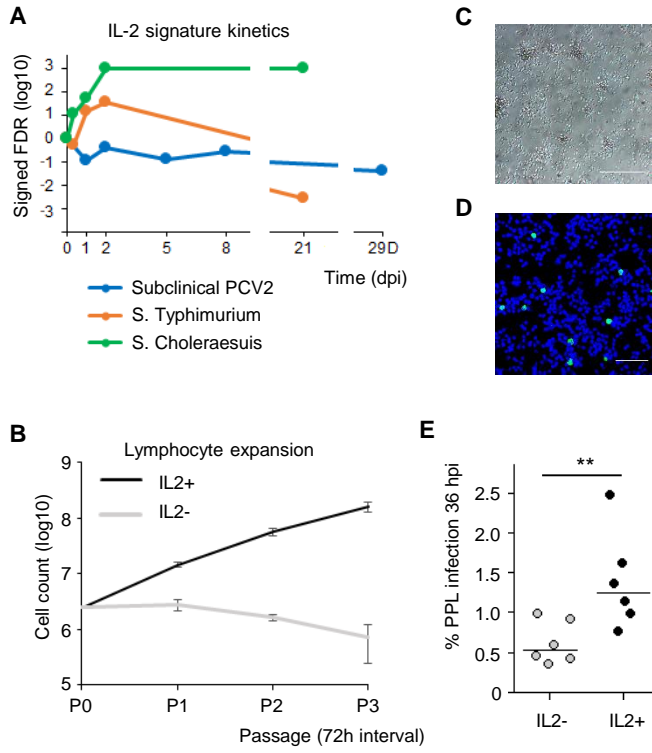

Figure 6

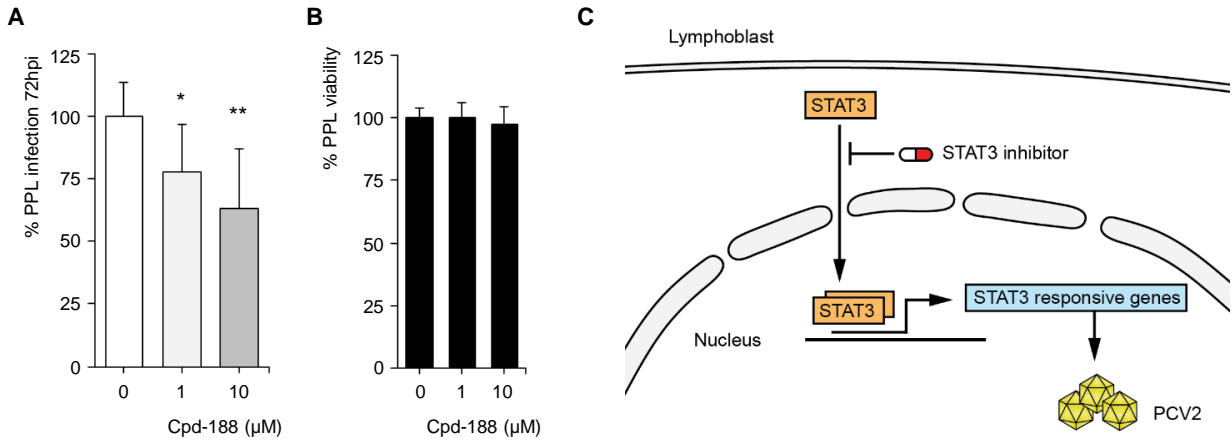

Figure 7

**A**  
ImmuneSigDB performance in lymph nodes of PMWS pigs VS healthy pigs

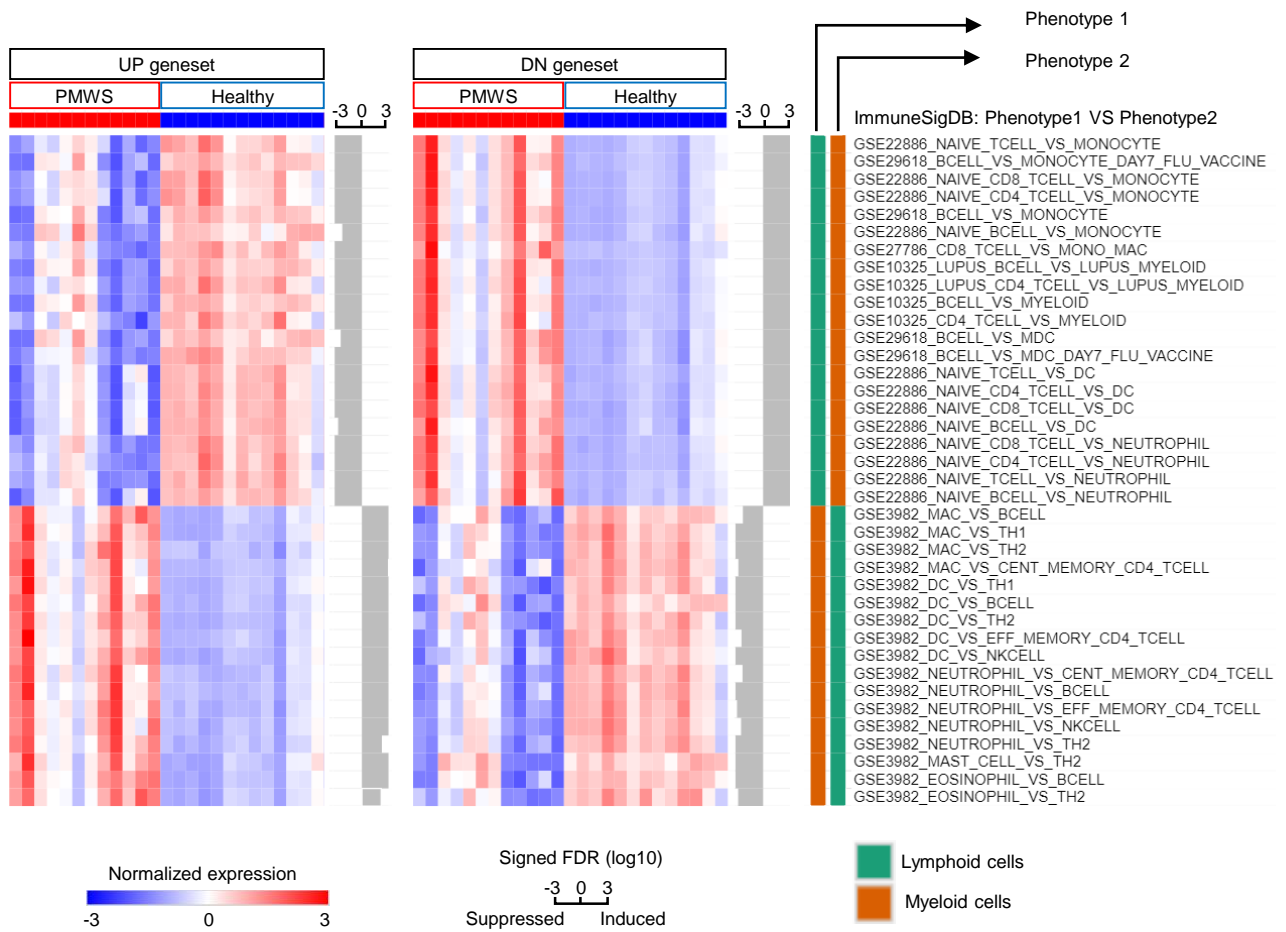

**B**  
Co-culture on porous insert

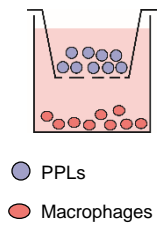

**C**  
Co-culture experimental setup

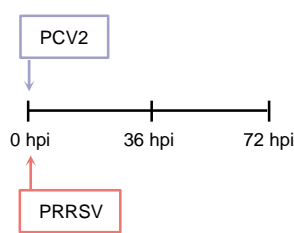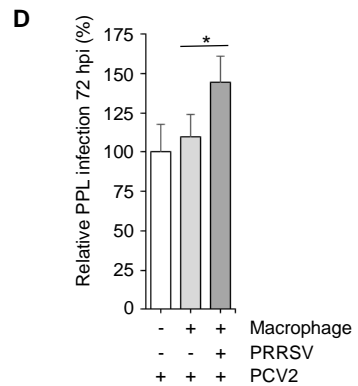

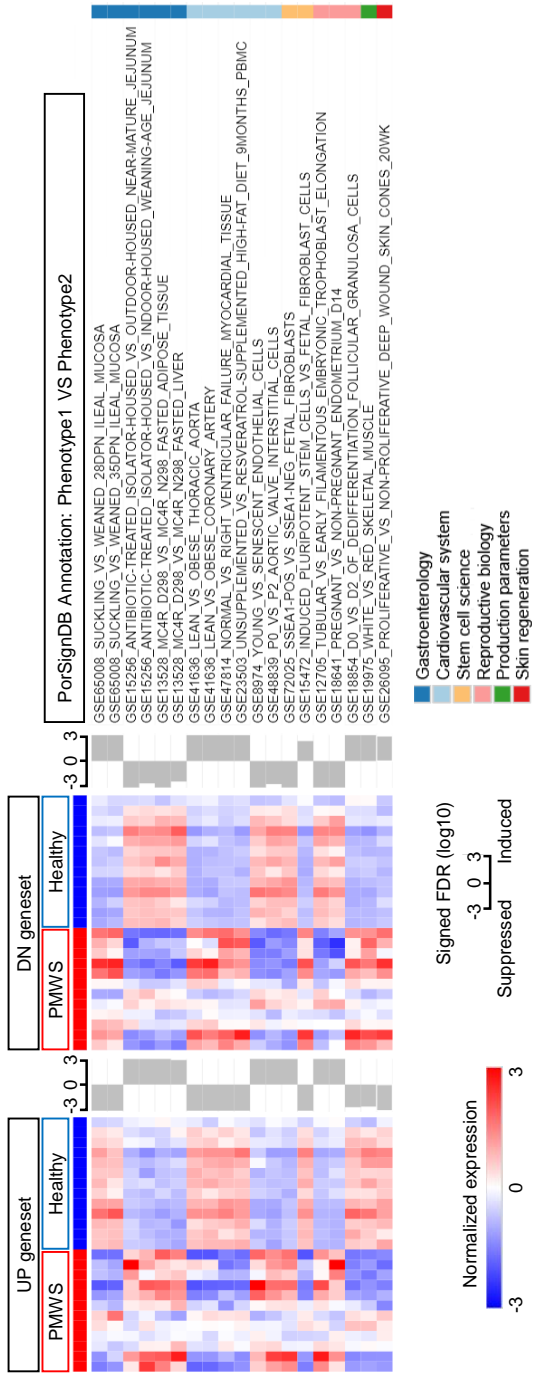

**Figure S2**

**A**

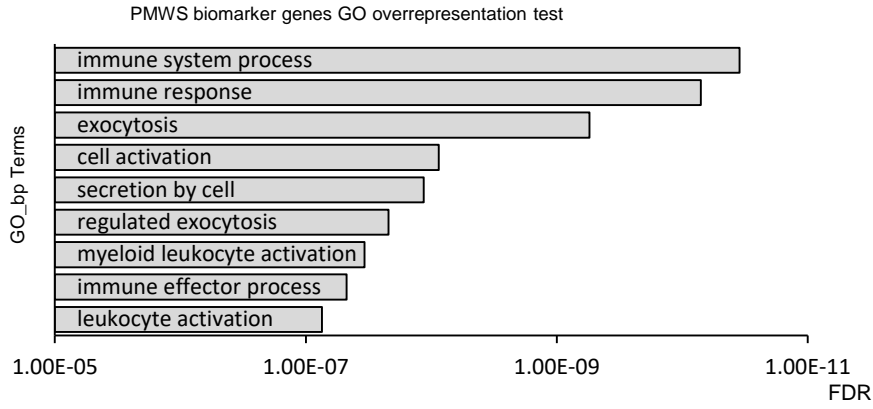

**B**

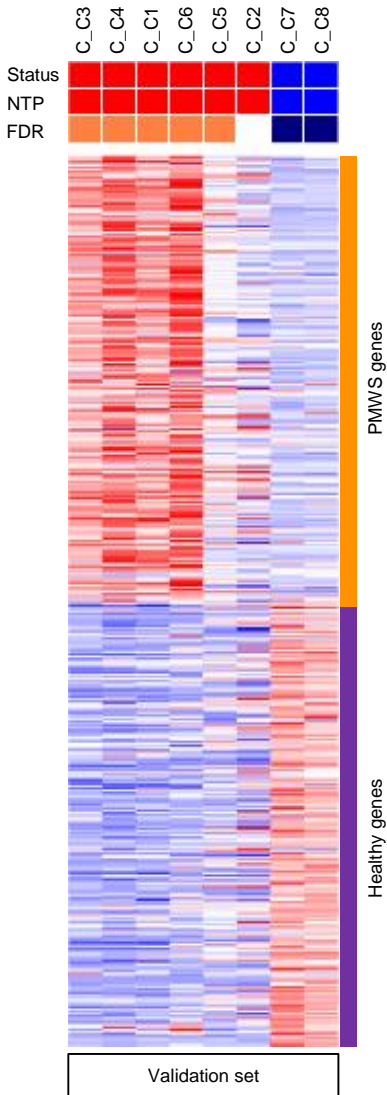

**C**

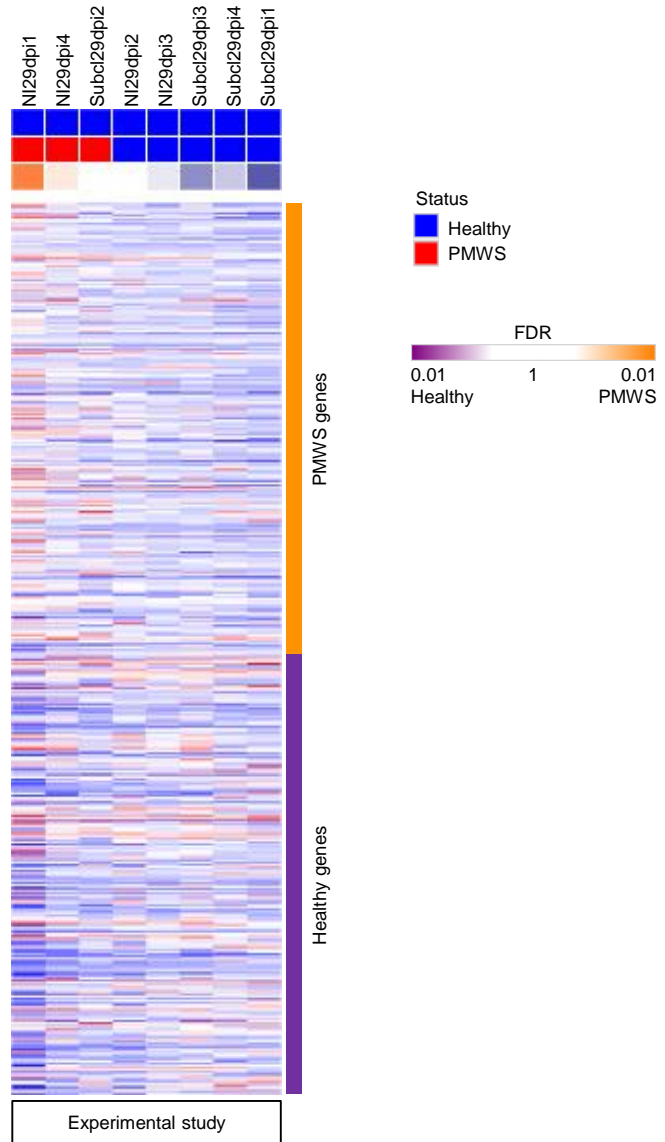



**Figure S3**

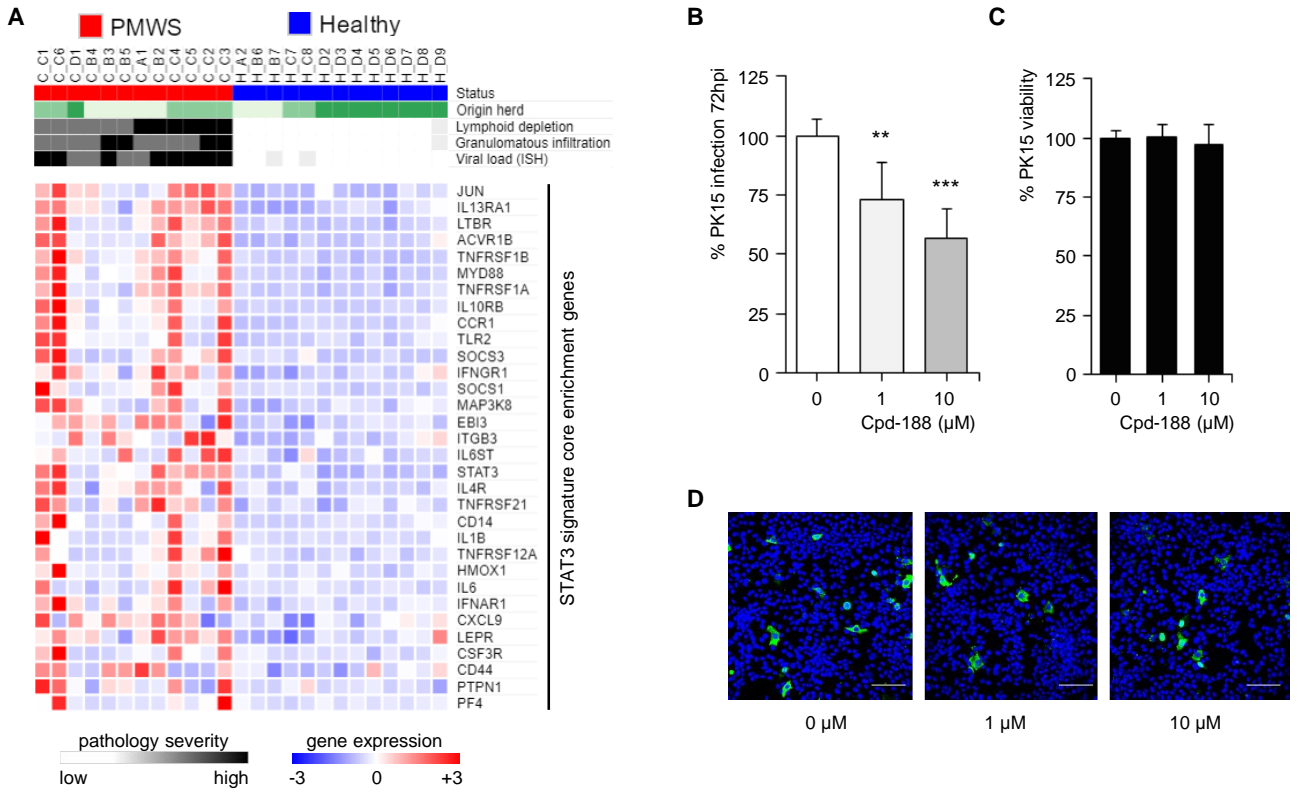

Source: https://www.biorxiv.org/content/10.1101/341644v1.full.pdf
